# Supplementary material for: In vivo antioxidant activity of mackerel (Scomber japonicus) muscle protein hydrolysate
Source: PeerJ. 2018 Dec 21;6:e6181. doi: 10.7717/peerj.6181 (PMC6305115; doi:10.7717/peerj.6181)
Supplement: Supplemental Information 1 [file peerj-06-6181-s002.xls]

## Sheet: 1. Body weight
1. Body weight (g)
GROUP	Mice	Initial	1 week	2 week	3 week	4 week	5 week	6 week
Normal	1	17.6	21	21.9	25	25.6	27.7	28.6
	2	19.8	21.1	22.5	25.2	25.6	27.9	28.7
	3	20.9	21.8	23.1	26.4	27.5	29.7	31.9
	4	21.8	22.3	23.2	26.6	27.4	30.5	32.2
	5	20	22.2	22.5	24.9	26.1	27.4	30.6
	6	19.3	20.9	22.1	24.2	23.9	27.4	27.6
	7	20.8	21.6	21.8	24.2	23.8	25.9	27.5
	8	23.1	24	26.6	30.8	31.6	33	35
Average		20.4125	21.8625	22.9625	25.9125	26.4375	28.6875	30.2625
Std. Dev.		1.6574	1.0141	1.5565	2.1656	2.49625	2.2548	2.64356
Control	1	21.7	23.1	23.7	25.9	26	28.7	28.4
	2	18.1	20.9	21.7	23.6	25.8	26	27.8
	3	22.3	23.3	24.4	26.2	26.2	28.2	28.8
	4	18.7	22.8	23.6	25.6	25.6	27.1	27.9
	5	18.6	20.9	21.6	23.8	24.3	25.9	27.3
	6	18.4	21.4	22.4	24	24.2	26.5	27.9
	7	18	21.7	22.2	24.2	24.9	26.3	26.5
	8	21.6	22.6	23.5	25	25	27.2	28.2
Average		19.675	22.0875	22.8875	24.7875	25.25	26.9875	27.85
Std. Dev.		1.84061	0.978975	1.04258	1.02042	0.763451	1.02321	0.703055
Positive control	1	20.2	20.5	21.1	22.6	22.4	24.3	25.8
	2	20.3	20.8	21.9	23.2	23.8	25.6	27
	3	19.9	21.4	23.5	25.2	25.4	27.2	28.6
	4	21.5	21.7	22.4	23.5	23.7	25.8	26.8
	5	20.3	22.3	23.9	24.7	25.5	27.2	28.8
	6	20	21.8	22.8	24.3	25.3	26.6	27.9
	7	19	20.7	21.4	22.1	22.7	24.6	25.9
	8	18.9	20.5	20.9	21.5	22.5	24.2	25.9
Average		20.0125	21.2125	22.2375	23.3875	23.9125	25.6875	27.0875
Std. Dev.		0.818426	0.681254	1.10833	1.29442	1.33463	1.23917	1.22175
M100	1	19.6	19.2	20	20.5	21.3	22.3	23.9
	2	20.4	20.4	20.9	22	22.9	24.5	24.2
	3	20.3	20.9	21.7	22.9	23.7	25	25.1
	4	20.5	21	21.7	22.7	22.8	24.1	25.2
	5	20.6	20.8	21.8	22.7	23.8	25.4	27
	6	21.8	22.4	23.4	24.8	25.1	26.2	26.7
	7	20.1	21.3	22.2	23.5	23.7	25.5	26
	8	22.2	23.5	23.6	24.6	25.7	27.7	28.9
Average		20.6875	21.1875	21.9125	22.9625	23.625	25.0875	25.875
Std. Dev.		0.872496	1.29111	1.19096	1.38764	1.36983	1.57792	1.64208
M250	1	17.2	20.5	20.5	21.6	21	23.9	24.8
	2	23.4	20.8	18.5	21.6	22.6	17.4	26.2
	3	19.7	20.3	20.7	22.5	24.1	26.6	27.1
	4	20.4	21	20.5	22.5	23.4	25.4	27
	5	21.2	20.8	23.2	25.4	26.6	28.6	30.4
	6	20.2	20.4	21.4	23.4	23.7	23.6	24.8
	7	20	22.1	23.8	25.3	26.3	26.8	28.3
	8	21.8	22.2	23.1	24.7	24.2	24.4	26.2
Average		20.4875	21.0125	21.4625	23.375	23.9875	24.5875	26.85
Std. Dev.		1.7916	0.73957	1.78801	1.57639	1.83259	3.3562	1.85318
M500	1	19.5	21.4	22.5	23.7	24.5	26.9	27.9
	2	19.7	20.7	21.6	23.5	24.6	26.7	27
	3	19.1	20.9	21.3	22.7	23.3	25	25.9
	4	20.7	21.7	22	23.2	23.6	25.3	26.4
	5	23.3	22.2	24.3	25.1	25.6	27.3	27.9
	6	19.6	18.2	20.2	21.4	22.1	22.8	22.6
	7	20.4	20.9	21.7	23.4	24.2	26	27.1
	8	22.1	22.9	24.5	27.3	27.8	20.8	31.1
Average		20.55	21.1125	22.2625	23.7875	24.4625	25.1	26.9875
Std. Dev.		1.45602	1.39124	1.47449	1.75372	1.69869	2.24499	2.37152

## Sheet: 2. Tissue weight
3. Tissue weight(g)
Group	Mice	Final body weight	Liver	Reletive liver weight	Heart	Spleen	Kidney	Testis	Retroperitoneal fat	Epididymal fat	Reletive epididymal weight
Normal	1	28.6	1.1	0.0384615	0.2	0.1	0.3	0.4	0.4	1.2	0.041958
	2	28.7	1	0.0348432	0.1	0.1	0.4	0.2	0.4	1.2	0.0418118
	3	31.9	1.2	0.0376176	0.1	0.1	0.4	0.3	0.5	1.5	0.0470219
	4	33.5	1.2	0.0358209	0.1	0.1	0.4	0.3	0.6	1.3	0.038806
	5	30.6	0.8	0.0261438	0.1	0.1	0.4	0.2	0.3	1.2	0.0392157
	6	28.6	1.1	0.0384615	0.2	0.1	0.4	0.2	0.1	1	0.034965
	7	30.5	1.2	0.0393443	0.1	0.1	0.3	0.2	0.2	1	0.0327869
	8	29.5	1.2	0.040678	0.2	0.2	0.4	0.2	0.4	1.2	0.040678
Average		30.2375	1.1	0.0364213	0.1375	0.1125	0.375	0.25	0.3625	1.2	0.0396554
Std. Dev.		1.76792	0.141421	0.00454968	0.0517549	0.0353553	0.046291	0.0755929	0.159799	0.160357	0.00439732
Control	1	28.35	0.9	0.031746	0.1	0.1	0.4	0.2	0.3	1.2	0.042328
	2	27.8	0.9	0.0323741	0.2	0.1	0.4	0.2	0.3	1.1	0.0395683
	3	28.8	1	0.0347222	0.1	0.1	0.4	0.2	0.2	0.9	0.03125
	4	27.85	0.9	0.032316	0.2	0.1	0.4	0.2	0.3	0.6	0.021544
	5	27.3	1	0.03663	0.1	0.1	0.4	0.2	0.2	1	0.03663
	6	27.85	1	0.0359066	0.1	0.1	0.4	0.2	0.3	0.8	0.0287253
	7	26.5	1	0.0377358	0.1	0.1	0.4	0.3	0	0.5	0.0188679
	8	28.15	1	0.035524	0.1	0.1	0.5	0.1	0.3	1.2	0.0426288
Average		27.825	0.9625	0.0346194	0.125	0.1	0.4125	0.2	0.2375	0.9125	0.0326928
Std. Dev.		0.693336	0.0517549	0.00223108	0.046291	1.4836e-17	0.0353553	0.0534522	0.106066	0.264237	0.0091619
Positive control	1	25.8	0.9	0.0348837	0.2	0.1	0.4	0.1	0.2	0.6	0.0232558
	2	26.95	0.9	0.0333952	0.2	0.3	0.3	0.2	0.2	0.9	0.0333952
	3	28.55	1.2	0.0420315	0.2	0.1	0.4	0.2	0.1	0.5	0.0175131
	4	26.8	0.9	0.0335821	0.1	0.1	0.3	0.4	0.3	0.6	0.0223881
	5	28.75	0.9	0.0313043	0.1	0.1	0.4	0.2	0.1	1	0.0347826
	6	27.9	1	0.0358423	0.1	0.1	0.5	0.1	0.3	1.5	0.0537634
	7	25.85	0.8	0.0309478	0.1	0.1	0.4	0.1	0.3	1.4	0.0541586
	8	25.9	0.9	0.034749	0.2	0.1	0.4	0.2	0	0.8	0.030888
Average		27.0625	0.9375	0.034592	0.15	0.125	0.3875	0.1875	0.1875	0.9125	0.0337681
Std. Dev.		1.21059	0.118773	0.00345503	0.0534522	0.0707107	0.064087	0.0991031	0.112599	0.372012	0.0137804
M100	1	25.85	0.7	0.0270793	0.2	0.1	0.3	0.3	0.4	0.9	0.0348162
	2	24.15	0.8	0.0331263	0.1	0.1	0.3	0.2	0.4	0.6	0.0248447
	3	25.1	1.1	0.0438247	0.1	0.1	0.3	0.3	0.2	0.9	0.0358566
	4	25.2	0.9	0.0357143	0.2	0.1	0.3	0.2	0.2	0.6	0.0238095
	5	27	1	0.037037	0.1	0.1	0.4	0.1	0.2	1.2	0.0444444
	6	26.7	0.7	0.0262172	0.1	0.1	0.4	0.2	0	0.7	0.0262172
	7	26	0.8	0.0307692	0.1	0.1	0.3	0.3	0.1	1	0.0384615
	8	27.9	1	0.0358423	0.1	0.1	0.3	0.2	0.3	1	0.0358423
Average		25.9875	0.875	0.0337013	0.125	0.1	0.325	0.225	0.225	0.8625	0.0330366
Std. Dev.		1.19486	0.148805	0.00574501	0.046291	1.4836e-17	0.046291	0.0707107	0.138873	0.213391	0.00734176
M250	1	25.75	0.9	0.0349515	0.1	0.1	0.3	0.3	0.4	0.9	0.0349515
	2	24.75	0.9	0.0363636	0.1	0.1	0.3	0.3	0.4	0.9	0.0363636
	3	27.05	0.9	0.0332717	0.2	0.1	0.4	0.2	0.4	1.2	0.0443623
	4	26.95	0.8	0.0296846	0.2	0.1	0.4	0.2	0.5	1.1	0.0408163
	5	28.35	1	0.0352734	0.1	0.1	0.4	0.2	0.2	0.9	0.031746
	6	25.8	0.8	0.0310078	0.1	0.1	0.4	0.1	0.1	0.9	0.0348837
	7	28.3	1	0.0353357	0.1	0.1	0.3	0.2	0.1	1	0.0353357
	8	26.2	1	0.0381679	0.1	0.1	0.5	0.2	0	0.5	0.019084
Average		26.6438	0.9125	0.034257	0.125	0.1	0.375	0.2125	0.2625	0.925	0.0346929
Std. Dev.		1.26532	0.0834523	0.00279917	0.046291	1.4836e-17	0.0707107	0.064087	0.184681	0.205287	0.00743182
M500	1	28.9	0.9	0.0311419	0.1	0.1	0.4	0.2	0.3	1	0.0346021
	2	27.02	1	0.03	0.1	0.1	0.4	0.2	0.5	0.9	0.0333087
	3	25.9	0.8	0.030888	0.1	0.1	0.3	0.2	0.3	1	0.03861
	4	26.35	0.9	0.0341556	0.1	0.1	0.3	0.2	0.4	0.9	0.0341556
	5	27.85	0.9	0.032316	0.2	0.1	0.4	0.3	0.2	0.7	0.0251346
	6	22.6	0.9	0.039823	0.1	0.1	0.3	0.3	0.2	0.7	0.0309735
	7	28.1	0.9	0.0320285	0.2	0.1	0.3	0.1	0.3	0.9	0.0320285
	8	29.05	0.9	0.0309811	0.2	0.1	0.4	0.2	0.5	1.2	0.0413081
Average		26.9712	0.9	0.0326668	0.1375	0.1	0.35	0.2125	0.3375	0.9125	0.0337651
Std. Dev.		2.09528	0.0534522	0.00314873	0.0517549	1.4836e-17	0.0534522	0.064087	0.118773	0.164208	0.00488036

## Sheet: 3. Serum 분석
3. Serum analysis
(TC : Total cholesterol, TG : Triglyceride)				Normal range of mouse ALT(U/L): 17-77 AST(U/L): 54-298 TG(mg/dL): 72-160 TC(mg/dL): 37-165
Group	Mice	ALT (U/L)	AST (U/L)	TC (mg/dL)	TG (mg/dL)
Normal	1	32.1	93.6	159.87	151.05
	2	44.91	110.16	142.26	124.23
	3	39	102.6	158.55	132.57
	4	54	90.6	151.41	133.86
	5	37.62	97.5	136.26	135.21
	6	34.2	95.4	129.63	147.33
	7	16.98	81.09	157.2	156.18
	8	36.96	96.09	147.84	140.04
Average		36.9712	95.88	147.877	140.059
Std. Dev.		10.614	8.48357	11.0622	10.7047
Std. Err.		3.75261	2.99939	3.91108	3.78469
Control	1	24	76.2	157.92	234.93
	2	25.02	61.08	176.58	222.87
	3	34.8	83.1	158.04	243.09
	4	20.01	75.9	142.41	254.4
	5	26.7	79.5	205.65	251.4
	6	38.19	91.5	167.28	221.61
	7	22.8	106.59	171.33	201.54
	8	26.4	68.1	166.5	260.7
Average		27.24	80.2463	168.214	236.318
Std. Dev.		6.15822	14.0381	18.3626	20.0121
Std. Err.		2.17726	4.96322	6.49215	7.07533
Positive	1	30.3	67.8	108.06	101.94
	2	30.3	57.21	131.07	121.8
	3	32.4	70.5	156.9	121.56
	4	27.6	93.9	150.48	190.17
	5	28.71	69.9	137.37	127.47
	6	28.2	77.7	159.03	199.62
	7	36.24	83.64	134.7	131.28
	8	27.6	79.5	184.2	170.01
Average		30.1687	75.0187	145.226	145.481
Std. Dev.		2.95378	11.1738	22.7647	36.0252
Std. Err.		1.04432	3.95054	8.04854	12.7368
M100	1	33.6	72.6	132.12	107.76
	2	35.55	112.2	208.8	210.99
	3	29.4	55.5	124.32	121.44
	4	24	70.5	134.61	170.55
	5	30.3	98.7	137.37	195.96
	6	24.3	65.7	124.11	128.85
	7	23.85	51	138.09	134.22
	8	34.2	63	155.73	189.78
Average		29.4	73.65	144.394	157.444
Std. Dev.		4.85923	21.192	27.8427	39.0783
Std. Err.		1.718	7.4925	9.84387	13.8163
M250	1	25.11	60.3	133.98	132.42
	2	33.75	66	154.2	168.54
	3	21.3	54	129.27	121.2
	4	23.4	112.53	164.7	106.62
	5	27	77.1	132.12	97.8
	6	28.95	104.7	214.59	202.26
	7	38.7	47.7	111.72	129.66
	8	27	71.16	111.45	138.78
Average		28.1512	74.1863	144.004	137.16
Std. Dev.		5.66536	23.262	33.9653	33.892
Std. Err.		2.00301	8.22434	12.0085	11.9826
M500	1	25.5	64.2	127.8	116.16
	2	24	70.23	145.98	120.9
	3	30.9	66	159.66	168.12
	4	24	74.1	182.52	220.95
	5	24	60.6	132.36	128.79
	6	29.1	72.6	123.63	125.16
	7	28.2	79.89	148.44	138.57
	8	24	60.6	141.81	120.51
Average		26.2125	68.5275	145.275	142.395
Std. Dev.		2.78641	6.87073	19.1136	35.7745
Std. Err.		0.985146	2.42917	6.75769	12.6482

## Sheet: 4. LPO assay
4. Lipid peroxidation and Antioxidant enzyme activity
Group	Mice	LPO	AO (U/L)	XO (U/L)
		(MDA mole/g of tissue)
Normal	1	1.73	31.0265	4.42864
	2	2.393	31.0855	4.50068
	3	1.965	34.1042	5.991
	4	2.475	32.649	6.15759
	5	1.608	29.6794	6.26565
	6	2.29	32.6293	5.38316
	7	2.004	32.1475	4.45565
	8	1.569	31.3412	5.4597
Average		2.00425	31.8328	5.33026
Std. Dev.		0.354077	1.34409	0.782087
Std. Err.		0.125185	0.475206	0.276509
Control	1	2.75	35.4907	6.15759
	2	2.762	35.7758	6.63035
	3	1.999	34.5762	5.84692
	4	2.286	33.5733	6.44575
	5	2.149	37.0049	6.14858
	6	2.561	33.2389	5.52724
	7	2.163	35.3432	6.31968
	8	2.359	33.5143	6.24764
Average		2.37863	34.8147	6.16547
Std. Dev.		0.285472	1.32175	0.345245
Std. Err.		0.100929	0.46731	0.122062
Positive Control	1	2.284	34.4385	6.12157
	2	2.155	32.9243	6.22512
	3	1.992	34.4582	6.40072
	4	1.963	34.4582	5.86943
	5	2.058	34.468	6.23863
	6	2.142	34.1632	6.58082
	7	2.069	36.6608	5.67582
	8	2.078	35.9823	6.32418
Average		2.09262	34.6942	6.17954
Std. Dev.		0.101314	1.14449	0.290246
Std. Err.		0.03582	0.404638	0.102617
M100	1	1.445	36.8771	4.86988
	2	1.977	34.7729	5.25709
	3	1.322	30.0531	4.9149
	4	1.393	37.2114	5.2796
	5	1.282	37.3982	5.05898
	6	1.531	30.2104	4.56821
	7	1.683	32.7276	5.8154
	8	2.035	32.0098	5.0995
Average		1.5835	33.9076	5.10795
Std. Dev.		0.289361	3.07493	0.366435
Std. Err.		0.102305	1.08715	0.129554
M250	1	2.282	34.7729	5.49122
	2	1.951	32.6096	5.60378
	3	2.325	34.1239	5.83791
	4	2.132	34.5762	5.64881
	5	2.169	32.826	5.33814
	6	1.875	34.9105	5.56326
	7	1.768	36.061	5.79739
	8	2.487	34.7729	5.21207
Average		2.12363	34.3316	5.56157
Std. Dev.		0.244332	1.13706	0.213272
Std. Err.		0.0863845	0.402012	0.075403
M500	1	1.298	35.766	5.02296
	2	2.209	35.4415	4.79784
	3	2.322	34.2616	5.41018
	4	1.954	34.9105	5.76137
	5	2.172	35.8053	5.50473
	6	2.787	35.4612	5.39667
	7	1.672	35.0678	5.25709
	8	2.433	34.2222	5.31562
Average		2.10588	35.117	5.30831
Std. Dev.		0.462391	0.620616	0.294402
Std. Err.		0.16348	0.219421	0.104087

## Sheet: 5. Catalase
5. Catalase activity
Cage-1
Group	MICE	Catalase	beta-actin	Catalase/b-actin	MEAN	Ratio	Mean			Group	Cage	Mice	Means ratios	Mean	Std. Dev.	Std. Err.
Normal	1	5721.5	2321.08	2.46501	2.92925	1.70382	2.0247			Normal	1	1	1.70382	1.74506	0.598622	0.211645
	2	4816.08	1988.74	2.42168		1.67387						2	1.67387
	3	5665.74	1938.03	2.92345		2.02069						3	2.02069
	4	6346.86	1624.55	3.90685		2.70042						4	2.70042
Control	1	3165.62	1828.57	1.7312	1.44676	1.19661	1				2	5	2.39768
	2	3932.98	2165.69	1.81604		1.25525						6	1.16371
	3	2658.5	2651.93	1.00248		0.692912						7	1.0065
	4	3022.33	2442.66	1.23731		0.85523						8	1.29381
Positive Control	1	4253.55	2703.2	1.57353	1.76954	1.08762	1.22311			Control	1	1	1.19661	1	0.213695	0.0755525
	2	4101.67	2358.54	1.73907		1.20205						2	1.25525
	3	3674.84	1941.1	1.89317		1.30856						3	0.692912
	4	4000.26	2136.45	1.87239		1.2942						4	0.85523
											2	5	1.25297
Cage-2												6	0.993271
Group	MICE	Catalase	beta-actin	Catalase/b-actin	MEAN	Ratio	Mean					7	0.932714
Normal	5	11552.6	2102.07	5.49582	3.35896	2.39768	1.46542					8	0.821047
	6	9233.68	3461.7	2.66738		1.16371				Positive control	1	1	1.08762	1.17141	0.122875	0.043443
	7	9800.09	4247.92	2.30703		1.0065						2	1.20205
	8	10008.1	3374.75	2.96559		1.29381						3	1.30856
Control	5	11001.1	3830.49	2.87198	2.29214	1.25297	1					4	1.2942
	6	9889.9	4343.92	2.27672		0.993271					2	5	1.21635
	7	9845.61	4605.24	2.13792		0.932714						6	1.14135
	8	10187	5412.99	1.88196		0.821047						7	1.19537
Positive Control	5	7923.49	2841.95	2.78804	2.56653	1.21635	1.11971					8	0.925757
	6	8954.02	3422.61	2.61614		1.14135				M100	1	1	0.995305	1.16528	0.238703	0.0843944
	7	8770.49	3200.95	2.73996		1.19537						2	1.03951
	8	7754.2	3654.25	2.12197		0.925757						3	1.07043
												4	0.977455
											2	5	0.979376
Cage-1												6	1.47093
Group	MICE	Catalase	beta-actin	Catalase/b-actin	MEAN	Ratio	Mean					7	1.59045
M100	1	1737.28	1206.48	1.43996	1.47667	0.995305	1.02068					8	1.19879
	2	3196.99	2125.77	1.50392		1.03951				M250	1	1	0.760902	0.67377	0.149468	0.0564934
	3	3010.87	1944.18	1.54865		1.07043						2	outlier
	4	3213.28	2272.26	1.41414		0.977455						3	0.727978
M250	1	2818.16	2560.01	1.10084	2.46651	0.760902	0.692985					4	0.590074
	2	6886.08	1004.05	6.85828		outlier					2	5	0.946932
	3	2735.99	2597.77	1.05321		0.727978						6	0.615977
	4	2207.16	2585.43	0.853694		0.590074						7	0.562579
M500	1	2009.58	2571.55	0.781466	1.09744	0.54015	0.75855					8	0.511946
	2	2329.28	2208.5	1.05469		0.729004				M500	1	1	0.54015	1.05187	0.422237	0.149283
	3	2817.41	2110.38	1.33503		0.922771						2	0.729004
	4	3179.82	2609.48	1.21857		0.842274						3	0.922771
												4	0.842274
Cage-2											2	5	0.880017
Group	MICE	Catalase	beta-actin	Catalase/b-actin	MEAN	Ratio	Mean					6	1.40244
M100	5	1962.75	874.326	2.24487	3.00245	0.979376	1.30989					7	1.84434
	6	2235.16	662.941	3.37159		1.47093						8	1.25397
	7	2677.11	734.355	3.64553		1.59045
	8	1924.58	700.406	2.7478		1.19879
M250	5	1517.16	698.991	2.1705	1.51134	0.946932	0.659359
	6	1249.46	884.941	1.41191		0.615977
	7	1587.41	1231.01	1.28951		0.562579
	8	1333.28	1136.2	1.17345		0.511946
M500	5	1897.41	940.648	2.01713	3.08338	0.880017	1.34519
	6	2864.41	891.062	3.2146		1.40244
	7	4490.6	1062.23	4.2275		1.84434
	8	4225.72	1470.18	2.87428		1.25397

## Sheet: 6.  SOD
6. SOD
Cage-1
Group	MICE	SOD	β-actin	SOD/β-actin	MEAN	Ratio	Mean			Group	Cage	Mice	Means ratios	Mean	Std. Dev.	Std. Err.
Normal	1	1270.43	2321.08	0.547342	0.579604	0.965426	1.02233			Normal	1	1	0.965426	1.60637	0.779008	0.275421
	2	1280.53	1988.74	0.643889		1.13572						2	1.13572
	3	1029.94	1938.03	0.531436		0.937371						3	0.937371
	4	967.82	1624.55	0.595747		1.05081						4	1.05081
Control	1	863.456	1828.57	0.472203	0.566943	0.832893	1				2	5	2.70748
	2	1531.58	2165.69	0.7072		1.24739						6	2.78205
	3	1256.7	2651.93	0.47388		0.83585						7	1.27342
	4	1500.99	2442.66	0.61449		1.08387						8	1.99868
Positive Control	1	1362.58	2703.2	0.504061	0.761204	0.889086	1.34265			Control	1	1	0.832893	1	0.387101	0.136861
	2	1434.82	2358.54	0.608351		1.07304						2	1.24739
	3	1385.94	1941.1	0.713996		1.25938						3	0.83585
	4	2603.06	2136.45	1.21841		2.14908						4	1.08387
											2	5	1.82142
Cage-2												6	0.624609
Group	MICE	SOD	β-actin	SOD/β-actin	MEAN	Ratio	Mean					7	0.850112
Normal	5	5454.49	2102.07	2.59481	2.09926	2.70748	2.19041					8	0.703855
	6	9229.88	3461.7	2.66628		2.78205				Positive control	1	1	0.889086	1.01277	0.524526	0.185448
	7	5184.3	4247.92	1.22043		1.27342						2	1.07304
	8	6464.37	3374.75	1.91551		1.99868						3	1.25938
Control	5	6686.61	3830.49	1.74563	0.958387	1.82142	1					4	2.14908
	6	2600.35	4343.92	0.598617		0.624609					2	5	0.774956
	7	3752.05	4605.24	0.814736		0.850112						6	0.498837
	8	3651.42	5412.99	0.674565		0.703855						7	0.920101
Positive Control	5	2110.74	2841.95	0.742708	0.654484	0.774956	0.682902					8	0.537715
	6	1636.28	3422.61	0.478078		0.498837				M100	1	1	1.61669	3.21347	1.8763	0.709175
	7	2822.64	3200.95	0.881812		0.920101						2	1.94649
	8	1883.17	3654.25	0.515339		0.537715						3	1.53591
												4	2.20644
											2	5	4.41195
Cage-1												6	outlier
Group	MICE	SOD	β-actin	SOD/β-actin	MEAN	Ratio	Mean					7	6.44732
M 100	1	1105.82	1206.48	0.916569	1.07508	1.61669	1.82638					8	4.32952
	2	2345.89	2125.77	1.10355		1.94649				M250	1	1	3.61061	3.25049	1.1131	0.420711
	3	1692.94	1944.18	0.870772		1.53591						2	outlier
	4	2842.43	2272.26	1.25093		2.20644						3	2.82203
M 250	1	5240.38	2560.01	2.04701	4.57022	3.61061	3.44267					4	3.89537
	2	12475.9	1004.05	12.4255		Outlier					2	5	5.06034
	3	4156.26	2597.77	1.59993		2.82203						6	3.3862
	4	5709.79	2585.43	2.20845		3.89537						7	2.32879
M 500	1	3317.13	2571.55	1.28994	1.18922	2.27525	2.0976					8	1.65009
	2	3007.89	2208.5	1.36196		2.40229				M500	1	1	2.27525	2.03605	0.402686	0.142371
	3	2743.72	2110.38	1.30011		2.29319						2	2.40229
	4	2100.3	2609.48	0.804876		1.41968						3	2.29319
												4	1.41968
Cage-2											2	5	1.50173
Group	MICE	SOD	β-actin	SOD/β-actin	MEAN	Ratio	Mean					6	1.78363
M 100	5	3696.96	874.326	4.22836	5.67524	4.41195	5.06293					7	2.34104
	6	5399.13	662.941	8.14421		Outlier						8	2.27158
	7	4537.6	734.355	6.17903		6.44732
	8	2906.23	700.406	4.14936		4.32952
M 250	5	3389.94	698.991	4.84976	2.97709	5.06034	3.10636
	6	2871.89	884.941	3.24529		3.3862
	7	2747.48	1231.01	2.23188		2.32879
	8	1796.82	1136.2	1.58142		1.65009
M 500	5	1353.82	940.648	1.43924	1.89233	1.50173	1.9745
	6	1523.18	891.062	1.7094		1.78363
	7	2383.26	1062.23	2.24363		2.34104
	8	3200.67	1470.18	2.17705		2.27158
